The pattern of circulatory effects of Forane suggests beta-adrenergic stimulating properties. Increased heart rate and dilatation of muscle vessels are compatible with beta stimulation.<sup>9</sup> Most anesthetics are direct myocardial depressants, as indicated by their effect on the isolated heart.<sup>20</sup> We expected Forane would have a similar effect. Despite this, we found maintenance of cardiac output and contractility (as indicated by I-J wave, pre-ejection period or rate of ventricular ejection) even at deep levels of anesthesia, with little or no elevation of right atrial pressure. In part, these may be reflex responses to lowered mean arterial pressure and concomitant increased venous compliance but, in part, the responses may also reflect beta-stimulating properties of Forane.

Concomitant administration of Forane and nitrous oxide, an agent with weak alpha-adrenergic stimulating properties,<sup>11</sup> would be expected to attenuate the decrease in total peripheral resistance seen with Forane alone. Current studies of volunteers in which the cardiovascular effects of the Forane-nitrous oxide combination are being measured indicate that this is true. Higher arterial pressure is maintained because the decrease in peripheral resistance is less with the combination than with Forane alone at equipotent anesthetic levels. In initial clinical studies we have also found notable increases in arterial pressure with surgical incision. Whether the response is due primarily to the influence of attendant sympathetic stimulation on peripheral resistance or to cardiac output, or to both, is not known.

The technical assistance of Mrs. Anne White and Miss Dianne M. K. Impelman is gratefully acknowledged. The gas chromatograph analyses were performed by Mr. Richard Shargel.

## References

1. Joas TA, Stevens WC: Comparison of the arrhythmic doses of epinephrine during Forane, halothane and fluorene anesthesia in dogs. *ANESTHESIOLOGY* 35:48-53, 1971
2. Halsey MJ, Sawyer DC, Eger EI II, *et al.*: Hepatic metabolism of halothane, methoxyflurane, cyclopropane, ethrane and Forane in miniature swine. *ANESTHESIOLOGY* 35: 43-47, 1971
3. Cromwell TH, Eger EI II, Stevens WC, *et al.*: Forane: Solubility in water, blood, and olive oil and uptake and elimination in man. *ANESTHESIOLOGY* (in preparation).
4. Eger EI II, Smith NT, Stoelting RK, *et al.*: Cardiovascular effects of halothane in man. *ANESTHESIOLOGY* 32:396-409, 1970
5. Saidman LJ, Eger EI II, Munson ES, *et al.*: Minimum alveolar concentrations of methoxyflurane, halothane, ether and cyclopropane in man: Correlation with theories of anesthesia. *ANESTHESIOLOGY* 28:994-1002, 1967
6. Gregory GA, Eger EI II, Smith NT, *et al.*: The cardiovascular effects of diethyl ether. *ANESTHESIOLOGY* 34:19-24, 1971
7. Cullen DJ, Eger EI II, Gregory GA: The cardiovascular effects of cyclopropane in man. *ANESTHESIOLOGY* 31:398-406, 1969
8. Cullen BF, Eger EI II, Smith NT, *et al.*: Cardiovascular effects of fluorene in man. *ANESTHESIOLOGY* 32:218-230, 1970
9. Alquist RP: A study of the adrenotropic receptors. *Amer J Physiol* 153:586-600, 1948
10. Morrow DH: Ventricular function during anesthesia. Effects of Anesthetics on the Circulation. Edited by HL Price and PJ Cohen. Springfield, Charles C Thomas, 1964, pp 122-138
11. Smith NT, Eger EI II, Stoelting RK: The cardiovascular and sympathomimetic responses to the addition of nitrous oxide to halothane in man. *ANESTHESIOLOGY* 32:410-421, 1970
12. Weissler AV, Harris LC, White CD: The left ventricular ejection time index in man. *J Appl Physiol* 18:919-923, 1963

## Drugs

**METHOXYFLURANE TOXICITY** Inorganic fluoride and nonvolatile organic fluoride were measured in a patient who had nephrotoxic effects thought to be due to methoxyflurane anesthesia. Concentrations of both fluorides were markedly elevated compared with concentrations in two patients who received methoxyflurane but did not develop nephrotoxic changes. Indirect evidence suggests that the inorganic fluoride concentration was sufficient to account for the nephrotoxic effects. The prolonged elevation of inorganic fluoride observed can be explained on the basis of the breakdown of the nonvolatile organic fluoride to inorganic fluoride and the poor renal clearance of both types. (Taves, D. R., and others: *Toxicity Following Methoxyflurane Anesthesia. II. Fluoride Concentrations in Nephrotoxicity*, J.A.M.A. 214: 91 (Oct.) 1970.)
